# Supplementary material for: Role of Antiplatelet Therapy in Patients with Severe Coronary Artery Disease Undergoing Coronary Artery Endarterectomy within Coronary Artery Bypass Surgery
Source: MDPI journal article supplement (doi:10.3390/jcdd10030112), 2023-03-07
Supplement: s1 [file s1]

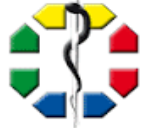

Name of the Patient:

Date of birth:

Which operation:

Date of surgery:

We have the following couple of questions regarding your health status after surgery:

1. How you manage your daily tasks? Independent/ dependent on help
2. Did you have a stroke since surgery? No / Yes → Date.....  
Do you have a neurological deficit? No / Yes → which one?.....
3. Do you have any lung disease? No / Yes → which one?.....
4. Do you have any limitation of physical activity (NYHA classification)? No / Yes → Class.....  
Class I: No limitation of physical activity.  
Class II: Slight limitation of physical activity.  
Class III: Marked limitation of physical activity.  
Class IV: Unable to carry out any physical activity without discomfort.
5. Did you have any chest pain radiating to the neck/jaw, to the left/right shoulder/arm or upper belly since surgery? No / Yes → Since when?.....
6. Did you have myocardial infarction after surgery? No / Yes → Date.....
7. Did you have coronary angiography after surgery? No / Yes → Date.....
8. Did you have stent-Implantation after surgery? No / Yes → Date.....
9. Did you undergo a new coronary artery bypass surgery? No / Yes → Date.....
10. Did you have any valvular infection after surgery? No / Yes → Since when?.....  
Which valve was / is affected ?.....

Filled by:

Follow-up date:

Approved and released by:  
Associate Professor Dr. S.-E. Shehada  
"Consultant cardiac surgeon"

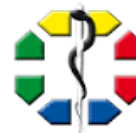

11. Did you have any valvular regurgitation after surgery? No / Yes → Since when?.....

Which valve was / is affected ?.....

12. Did you undergo another cardiac surgery? No / Yes → Date.....

Which operation you had ?.....

13. Do you have heart arrhythmias?

Atrial fibrillation No / Yes → Since when?.....

Another arrhythmia No / Yes → Since when?.....

Pacemaker implantation No / Yes → Date.....

14. Did you have kidney disease or insufficiency after surgery? No / Yes

Are you on dialysis? No / Yes → Since when?.....

15. Do you have peripheral or central vascular disease? No / Yes → which one?.....

Did you need surgery or stent implantation No / Yes → Date.....

16. Did you acquire another disease or undergo any other surgery? No / Yes → Date.....

Which operation you had ?.....

17. When was the last echocardiographic control? Date.....

Can we have a copy of the echocardiographic report? No / Yes

Do you have an appointment for the next examination? No / Yes → Date.....

18. What is the name of your cardiologist / GP ? Name....., City.....

19. In case we still have questions, is it okay to call you ? No / Yes, Phone number.:.....

Remarks:.....

.....

Patient's signature.....

We thank you for your patience and effort!

Filled by:

Follow-up date:

Approved and released by:

Associate Professor Dr. S.-E. Shehada  
"Consultant cardiac surgeon"
